# Supplementary material for: The 14th Ile residue is essential for Leptin function in regulating energy homeostasis in rat
Source: PubMed Central journal article supplement (PMC4932527; doi:10.1038/srep28508), 2016-07-05
Supplement: srep28508-s1.pdf [file srep28508-s1.pdf]

## Supplementary information

### The 14th Ile residue is essential for Leptin function in regulating energy homeostasis in rat

Shuyang Xu<sup>1,†</sup>, Xianmin Zhu<sup>1,†</sup>, Hong Li<sup>2,†</sup>, Youtian Hu<sup>3</sup>, Jinping Zhou<sup>4</sup>, Di He<sup>1</sup>, Yun Feng<sup>4</sup>, Lina Lu<sup>4</sup>, Guizhen Du<sup>5</sup>, Youjin Hu<sup>4,5</sup>, Tiancheng Liu<sup>2</sup>, Zhen Wang<sup>2</sup>, Guohui Ding<sup>2</sup>, Jiayu Chen<sup>1</sup>, Shaorong Gao<sup>1</sup>, Fang Wu<sup>3</sup>, Zhigang Xue<sup>4</sup>, Yixue Li<sup>2</sup>, Guoping Fan<sup>1,5,\*</sup>

\*To whom correspondence should be addressed at: Tongji University, School of Life Sciences and Technology, 1239 Siping Road, Shanghai 200092, China

TEL: +86 21 65982417; Email: guopingfan@gmail.com

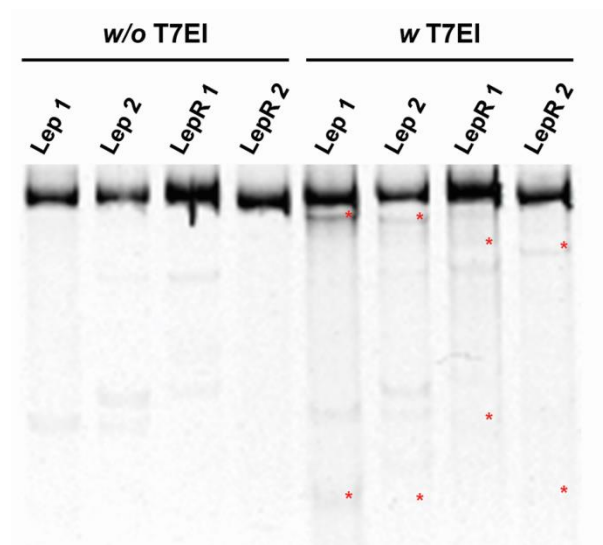

**Supplementary Figure S1:** The T7 endonuclease I (T7EI) assay.

Lep 1, Lep 2, LepR 1 and LepR 2 CRISPR constructs resulted in target-specific mutation after in-vitro transfection of BRL cells. Compared to the controls (w/o T7EI), PCR products were cleaved by T7EI with expected fragment sizes (indicated by red asterisks \*)

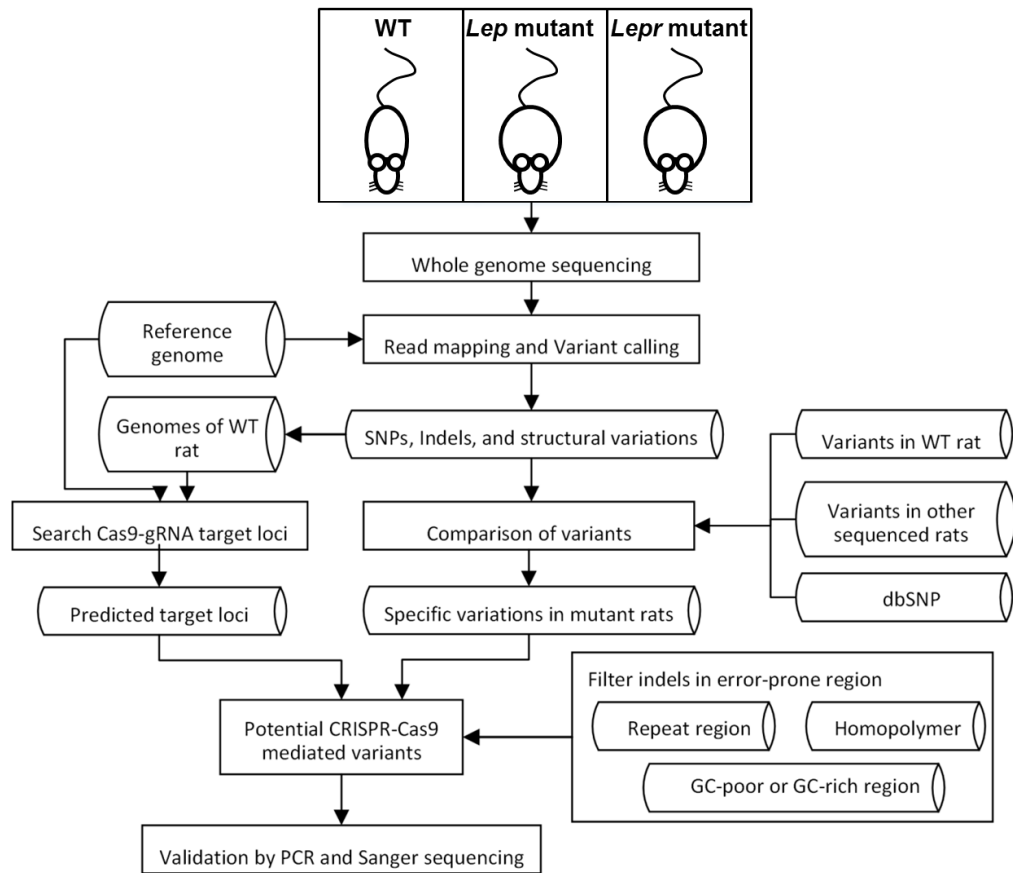

**Supplementary Figure S2:** Pipeline for whole-genome sequencing and computational analysis of CRISPR-Cas9 off-target effect.

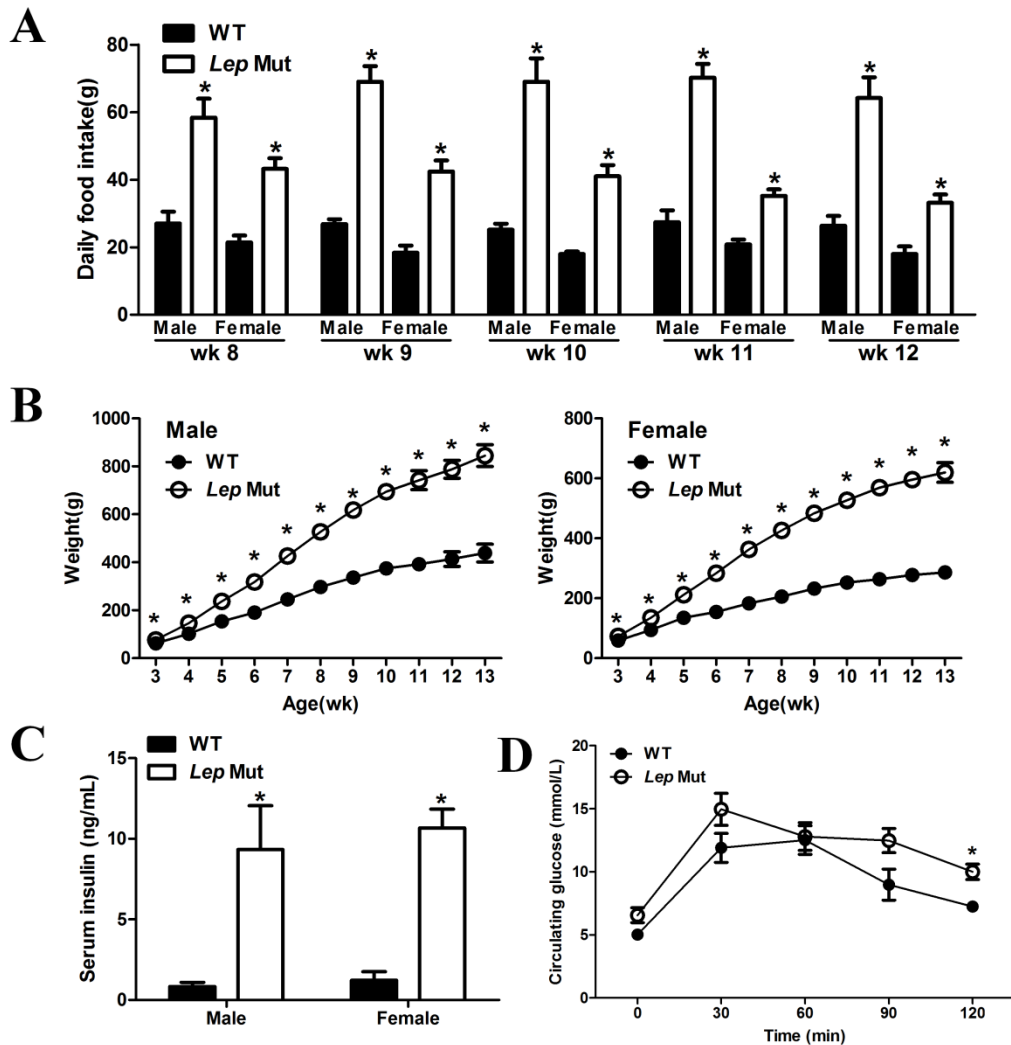

**Supplementary Figure S3:** LEP-deficiency induced obesity, glucose intolerance, and hyperinsulinemia in the founders.

(A) Daily food intake (Means  $\pm$ SD) for WT (n=5) and *Lep* Mut (n=5) measured over 5 weeks. \*,  $P < 0.05$  vs. controls.

(B) Body weight was measured over 13 weeks for WT (n=5) and *Lep* mutant (n=9) males, and WT (n=6) and *Lep* mutant (n=8) females. \*,  $P < 0.01$  vs. controls.

(C) Serum insulin levels in 40-wk-old WT and *Lep* Mut rats (n=5 for each group). \*,  $P < 0.05$  vs. controls.

(D) Male WT and *Lep* mutant rats (n=5 for each) at age of wk-10 were ip injected with D-glucose, and serum glucose levels were determined at 0, 30, 60, 90, and 120 min after administration. \*,  $P < 0.05$  vs. controls.

Supplementary Table 2 Fasting serum chemistry of *Lep* mutant founders at 16 wk of age

|        |                | Triglycerides<br>(mmol/L) | Cholesterol<br>(mmol/L) | HDL<br>(mmol/L) | LDL<br>(mmol/L) | Glucose<br>(mmol/L) |
|--------|----------------|---------------------------|-------------------------|-----------------|-----------------|---------------------|
| Male   | WT             | 1.08±0.46                 | 1.88±0.32               | 0.68±0.06       | 1.54±0.05       | 3.58±0.21           |
|        | <i>Lep</i> Mut | 2.45±1.35*                | 5.36±1.28*              | 1.85±0.32*      | 2.06±0.32*      | 4.27±0.62*          |
| Female | WT             | 0.38±0.03                 | 2.3±0.18                | 0.83±0.03       | 1.62±0.03       | 3.83±0.31           |
|        | <i>Lep</i> Mut | 4.34±1.08*                | 3.36±0.58*              | 1.01±0.24       | 1.63±0.13       | 5.00±1.61           |

HDL, High-density lipoprotein; LDL, low-density lipoprotein.

Values are means ±SD. (Male: n=4 for WT and n=7 for Mut; Female: n=3 for WT and n=7 for Mut)

\* P < 0.05 vs. controls.

Supplementary Table 3 Primers for PCR amplification.

| Primer                                                       | Sequence               | Product<br>Size(bp) |
|--------------------------------------------------------------|------------------------|---------------------|
| Primers for sgRNA target regions, <i>Lep</i> RT-PCR and qPCR |                        |                     |
| Lep F                                                        | AGCGAGGAAAATGTGCTGGA   | 600                 |
| Lep R                                                        | AGGAAGGGGAGAGAGTGGTC   |                     |
| Lepr1 F                                                      | CACACTCGTACACAGGCATG   | 591                 |
| Lepr1 R                                                      | TGGAGCCTTAATGCAGAGCT   |                     |
| Lepr2 F                                                      | GGAGGAGAGATGCCAGGGAA   | 520                 |
| Lepr2 R                                                      | CAGCGTCTTCCCTTCAGTGT   |                     |
| Lep RT F                                                     | ATGTGCTGGAGACCCCTGT    | 501                 |
| Lep RT R                                                     | TCAGCATTCAGGGCTAAGGT   |                     |
| GAPDH qPCR F                                                 | GGGAAGCTGGTCATCAACGG   | 110                 |
| GAPDH qPCR R                                                 | ACGCCAGTAGACTCCACGAC   |                     |
| Lep qPCR F                                                   | TCCAGGATGACACCAAACCCT  | 123                 |
| Lep qPCR R                                                   | GGTGAAGCCCGGGAATGAAG   |                     |
| Primers for WG off-target regions                            |                        |                     |
| 17-1F                                                        | AGGATCAATGAAAACGCCCC   | 505                 |
| 17-1R                                                        | AGAGTCAGAGTCCTCCCGTA   |                     |
| 17-2F                                                        | GTAACAGAAATGGCCGCGAT   | 567                 |
| 17-2R                                                        | TCAAGTGTTTTATGGCTGAGCT |                     |
| 17-3F                                                        | CCAGGCCAGCACTATTCTT    | 550                 |
| 17-3R                                                        | AGCCTCTCTCTGCACCAAAT   |                     |

|       |                       |     |
|-------|-----------------------|-----|
| 23-1F | GAGGGAAATCACAGGGGTCA  | 530 |
| 23-1R | CATTTGCCCTCCATCTCTGC  |     |
| 23-2F | AATCCACCATCAGCCAGGAA  | 549 |
| 23-2R | TCAGGTTGTGTCAAAGCAGC  |     |
| 23-3F | GGACCACGTTGTAACAGCTT  | 595 |
| 23-3R | GGAGGTGTAGACATGTCCCC  |     |
| 23-4F | GCGAGTATCTCTTTGAGCGC  | 507 |
| 23-4R | AGCCTAATCTGTGGTCCTTCC |     |
| 23-5F | TCCCCTAATCTTCCTGCCTT  | 591 |
| 23-5R | AGCCATCAACCAGGAGCATA  |     |
| 23-6F | CCCCACACCTACCTTAACAGT | 537 |
| 23-6R | GGCAAGATGTCACCTCTCCT  |     |
| 23-7F | CTGAACTGTGTGGTGCTGG   | 502 |
| 23-7R | CACAGGGCCAACATAGACCT  |     |

Primers for Lep1 gRNA off-target regions

|            |                      |     |
|------------|----------------------|-----|
| Lep1-OT1-F | CAATGCACCACTGTCACACA | 650 |
| Lep1-OT1-R | CGACGGCTCTAAGGACAGAA |     |
| Lep1-OT2-F | CTAGGTAAAGCGATGCAGGC | 665 |
| Lep1-OT2-R | CCCTTCTCCTCAGCTGTCTC |     |
| Lep1-OT3-F | CTCACGAGTGGCTTTGTTCC | 645 |
| Lep1-OT3-R | ACCCAAGCTTCTCTACCCAC |     |
| Lep1-OT4-F | CCATGCTTCTCACCACGATG | 692 |
| Lep1-OT4-R | TGCACACCAGAACCCTATGT |     |
| Lep1-OT5-F | TTGTGTGAGGTAGTGGCTGT | 582 |
| Lep1-OT5-R | AGCAGTCTTCATGCTTGGG  |     |
